# Supplementary material for: An Efficient Homologous Recombination-based in situ Protein-labeling Method in Verticillium dahliae
Source: Preprints.org preprint supplement (doi:10.20944/preprints202312.1553.v1), 2023-12-20
Supplement: Supplementary file 1 [file supplementary]

**Supplementary Table 1. Primers used in this study**

| Gene | Primers | Sequences (5’→3’) | Application |
| --- | --- | --- | --- |
| *VdCf2* | G1 | AATTCGAGCTCGCTGAGGGTTTAATTAAGATGCTCTCGCGCGACAC | *In situ* GFP and Flag tagging of *VdCf2* |
| G3 | TCGATGGGCCCGCTGAGGACTTAATTAATGCCTTGGGCGTGAGGGC |
| G4 | CCCCGACTAGTGCTGAGGCATTAATTAAATGATGCGTCAAGTCCAAT |
| G2 | TCACGAAGCTTGCTGAGGTCTTAATTAATGGTCGCACGAAATGGAG |
| V1 | GCACAAGTGCCCGTACTG |
| V2 | GTTCCCACATCCTGGCGC |
| *VdDMM2* | G1 | AATTCGAGCTCGCTGAGGGTTTAATTAACCAAGCGGCGCCGGACGC | *In situ* GFP and Flag tagging of *VdDMM2* |
| G3 | TCGATGGGCCCGCTGAGGACTTAATTAACCGCGAATTCATGCCCGC |
| G4 | CCCCGACTAGTGCTGAGGCATTAATTAAAGAATGTTCGGACCCGGT |
| G2 | TCACGAAGCTTGCTGAGGTCTTAATTAATAGGAACAGAAACCTTGC |
| V1 | AGATTACTTCAACACGGGCTC |
| V2 | CTCCCGGAACCATCATCTTCC |
|  | Hpt-F | TCTCCTTGCATGCACCATTCCTTG | Detection of VdCf2-GFP/Flag andVdDMM2- GFP/Flag |
| HPT-R | GCAGCTATTTACCCGCAGGA |
| PGKO-seq-F | CCAATTACACCCTTTGCGCC |
| PGKO-seq-R | AAGAAAACCCACGCCACCTA |
